# Supplementary material for: Unveiling the role of Gardnerella vaginalis in polymicrobial Bacterial Vaginosis biofilms: the impact of other vaginal pathogens living as neighbors
Source: PubMed Central journal article supplement (PMC6474217; doi:10.1038/s41396-018-0337-0), 2019-01-22
Supplement: 41396_2018_337_MOESM1_ESM.pdf [file 41396_2018_337_MOESM1_ESM.pdf]

1 **Supplementary data**

2 *The ISME Journal*

3

4 Joana Castro<sup>1,2</sup>, Daniela Machado<sup>1</sup>, Nuno Cerca<sup>1</sup>

5

6 <sup>1</sup> Centre of Biological Engineering (CEB), Laboratory of Research in Biofilms Rosário  
7 Oliveira (LIBRO), University of Minho, Campus de Gualtar, 4710-057 Braga, Portugal.

8 <sup>2</sup> Instituto de Ciências Biomédicas Abel Salazar (ICBAS), University of Porto, Rua de  
9 Rua de Jorge Viterbo Ferreira 228, 4050-313 Porto, Portugal.

10

11

12 \* Corresponding author: [nunocerca@ceb.uminho.pt](mailto:nunocerca@ceb.uminho.pt)

13 Centre of Biological Engineering (CEB), Laboratory of Research in Biofilms Rosário  
14 Oliveira (LIBRO), University of Minho, Campus de Gualtar, 4710-057 Braga, Portugal  
15 Tel.: +351 253604423, Fax: +351 253604429.

16

17

18

19

20

21

22

23

24

25

26

27

28

29 **Supplementary Table S1.** Bacterial species used in PNA-FISH assays and their specificity with PNA Gard162 probe

| Bacteria ( <i>n</i> = 16)                   | Accession numbers <sup>a</sup> | OD/CFU Calibration                                       | Gard162 Probe efficiency <sup>b</sup> | Reference           |
|---------------------------------------------|--------------------------------|----------------------------------------------------------|---------------------------------------|---------------------|
| <i>Actinomyces neuui</i> UM067An            | KT805271.1                     | $OD_{600nm} = 2 \times 10^{-12}(\text{CFU/mL}) + 0.2806$ | -                                     | This study          |
| <i>Atopobium vaginae</i> FA                 | absence <sup>c</sup>           | $OD_{600nm} = 9 \times 10^{-13}(\text{CFU/mL}) + 0.0818$ | -                                     | Machado et al, 2013 |
| <i>Brevibacterium ravenburgense</i> UM066Br | KT805269.1                     | $OD_{600nm} = 1 \times 10^{-9}(\text{CFU/mL}) - 0.0585$  | -                                     | This study          |
| <i>Corynebacterium amycolatum</i> UM065Ca   | KT805275.1                     | $OD_{600nm} = 6 \times 10^{-10}(\text{CFU/mL}) + 0.0320$ | -                                     | This study          |
| <i>Corynebacterium tuscaniense</i> UM137Ct  | KT805278.1                     | $OD_{600nm} = 7 \times 10^{-11}(\text{CFU/mL}) + 0.1549$ | -                                     | This study          |
| <i>Enterococcus faecalis</i> UM035          | KT614045.1                     | $OD_{600nm} = 3 \times 10^{-11}(\text{CFU/mL}) + 0.0002$ | -                                     | This study          |
| <i>Gardnerella vaginalis</i> UM241          | KP996683.1                     | $OD_{600nm} = 5 \times 10^{-9}(\text{CFU/mL}) + 0.1037$  | ++++                                  | This study          |
| <i>Mobiluncus mulieris</i> ATCC 35239       | NZ_GL405260.1                  | $OD_{600nm} = 4 \times 10^{-9}(\text{CFU/mL}) + 0.010$   | -                                     | Machado et al, 2013 |
| <i>Nosocomiicoccus ampullae</i> UM121Na     | KT805272.1                     | $OD_{600nm} = 3 \times 10^{-12}(\text{CFU/mL}) + 0.1279$ | -                                     | This study          |
| <i>Prevotella bivia</i> ATCC 29303          | L16475.1                       | $OD_{600nm} = 6 \times 10^{-8}(\text{CFU/mL}) + 0.0214$  | -                                     | Machado et al, 2013 |
| <i>Propionibacterium acnes</i> UM034Pa      | KT805265.1                     | $OD_{600nm} = 1 \times 10^{-10}(\text{CFU/mL}) + 0.0140$ | -                                     | This study          |
| <i>Staphylococcus hominis</i> UM224Sh       | KT923487.1                     | $OD_{600nm} = 3 \times 10^{-10}(\text{CFU/mL}) + 0.1401$ | -                                     | This study          |
| <i>Staphylococcus saprophyticus</i> UM121Ss | KT923484.1                     | $OD_{600nm} = 4 \times 10^{-9}(\text{CFU/mL}) + 0.0238$  | -                                     | This study          |
| <i>Staphylococcus simulans</i> UM059Ss      | KT805267.1                     | $OD_{600nm} = 5 \times 10^{-12}(\text{CFU/mL}) + 0.6540$ | -                                     | This study          |
| <i>Staphylococcus warnerii</i> UM224Sw      | KT923488.1                     | $OD_{600nm} = 3 \times 10^{-9}(\text{CFU/mL}) + 0.0038$  | -                                     | This study          |
| <i>Streptococcus anginosus</i> UM241b       | KT805274.1                     | $OD_{600nm} = 4 \times 10^{-10}(\text{CFU/mL}) + 0.4236$ | -                                     | This study          |

30 <sup>a</sup>The accession numbers of partial *16S ribosomal RNA* or *rpoB* gene sequence of vaginal isolates are downloadable from NCBI. <sup>b</sup> The PNA Probe (Gar162) efficiency was  
31 tested for each strain, with the following hybridization PNA FISH qualitative evaluation: (-) Absence of hybridization; (++) Moderate hybridization; (+++) Good  
32 hybridization; (++++) Optimal hybridization. The table shows the median value from the ten fields of view of each strain. <sup>c</sup> Strain isolated from a woman with BV based on  
33 Amsel criteria at Virginia Commonwealth University (VCU) Women's Health Clinic and it was kindly offered by Dr. Kimberly Jefferson.

34 **Supplementary Table S2.** Primers used in qPCR experiments

| Target gene                  | Gene description                                           | Primer sequence (5' to 3') | T <sub>melting</sub> (°C) | Efficiency <sup>a</sup> (%) | Amplicon size (bp) |
|------------------------------|------------------------------------------------------------|----------------------------|---------------------------|-----------------------------|--------------------|
| <i>16S RNA</i>               | 16S ribosomal RNA of <i>G. vaginalis</i>                   | Fw TGAGTAATGCGTGACCAACC    | 55.2                      | 100                         | 167                |
|                              |                                                            | Rv AGCCTAGGTGGGCCATTACC    | 59.3                      |                             |                    |
| <i>HMPREF0424_0103 (vly)</i> | Thiol-activated cytolysin vaginolysin                      | Fw GAACAGCTGGGCTAGAGGTG    | 60.01                     | 100                         | 153                |
|                              |                                                            | Rv AATTCCATCGCATTCTCCAG    | 60.04                     |                             |                    |
| <i>Sld</i>                   | Sialidase                                                  | Fw CCGAATTTGCGATTTCTTCT    | 54.00                     | 86                          | 189                |
|                              |                                                            | Rv CGTACGGAAGTTTTGGAAGC    | 58.00                     |                             |                    |
| <i>HMPREF0424_0821</i>       | Glycosyltransferase, group 2 family protein                | Fw CAACGAAGGCATAGGTTTCC    | 59.57                     | 99                          | 156                |
|                              |                                                            | Rv GCGCTTGGAAGTCTTTAAC     | 60.02                     |                             |                    |
| <i>HMPREF0424_1122</i>       | Multidrug resistance ABC transporter                       | Fw CAGCACCTGTAGCTCCAACA    | 60.05                     | 89                          | 195                |
|                              |                                                            | Rv TGGCTCAAGAGATTGTGTGC    | 59.99                     |                             |                    |
| <i>HMPREF0424_0156</i>       | Bacitracin transport ATP-binding protein<br>BcrA           | Fw CCGACCGCATACTATTTTG     | 60.34                     | 90                          | 178                |
|                              |                                                            | Rv GCAAGACGGTCTCCAAACTC    | 59.85                     |                             |                    |
| <i>HMPREF0424_1196</i>       | LPXTG-motif cell wall anchor domain-<br>containing protein | Fw TGCAAAGACAGGCGATAGTG    | 60.00                     | 99                          | 173                |
|                              |                                                            | Rv TAATCGTTGCGGTTGTTTCA    | 60.11                     |                             |                    |

<sup>a</sup> PCR amplification efficiency (E) for each gene was determined from the slope of a standard curve ( $E = 10^{-1/\text{slope}}$ ), generated with a 10-fold dilution series of cDNA.

35  
36

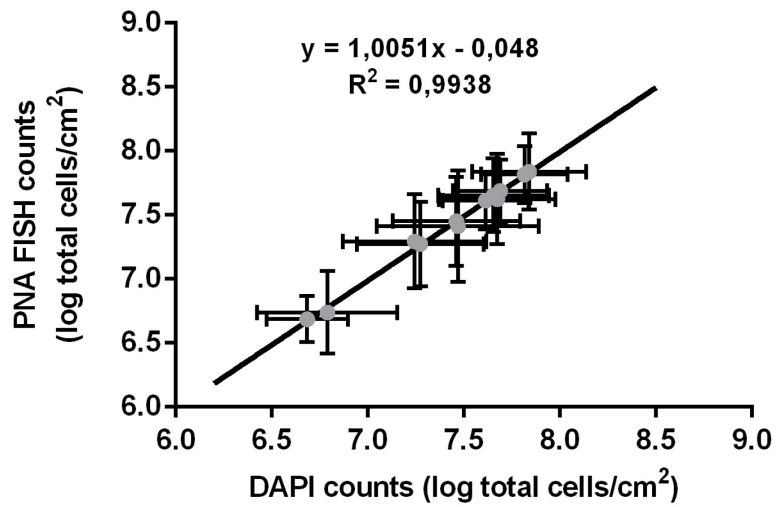

37  
38  
39  
40  
41  
42  
43  
44  
45  
46  
47  
48  
49  
50  
51  
52  
53  
54  
55  
56  
57  
58

**Supplementary Figure S1.** Correlation between the PNA FISH counts and the DAPI counts for *G. vaginalis* at different bacterial concentrations, in which BVGV biofilm cells that were identified indirectly by DAPI coincided with the populations quantified by PNA FISH. Each data point represents the mean  $\pm$  s.d..

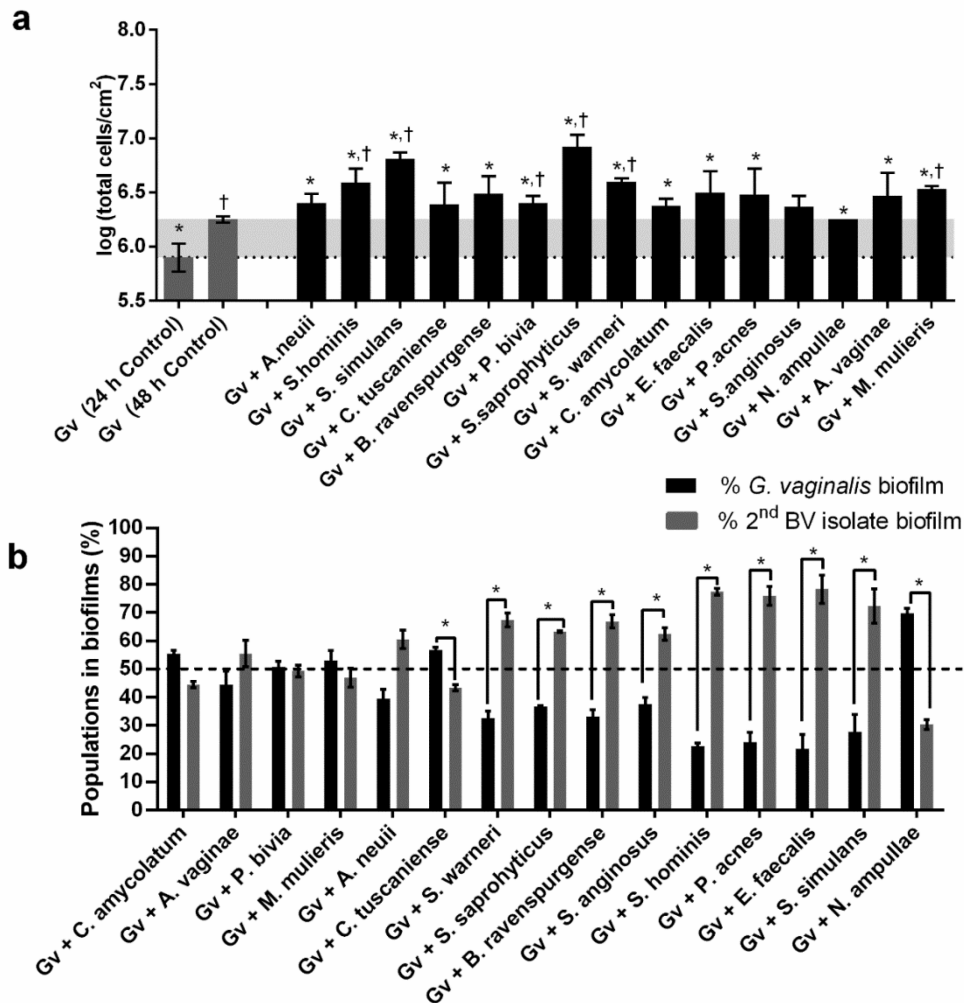

59

60 **Supplementary Figure S2.** Biofilm formation profiles for each BV-associated species

61 consortium ( $10^7$  CFU/mL of Gv &  $10^5$  CFU/mL of BV-associated bacteria) on dual-

62 species biofilms. (a) Total cells counts by DAPI for mono- (*G. vaginalis* controls) and

63 dual-species biofilms. (b) Total percentage of cells detected by PNA FISH for 48h

64 biofilms. Each data point represents the mean  $\pm$  s.d.. \*, † Values are significantly

65 different between the dual-species consortium and the single- *G. vaginalis* biofilm for

66 24 h and 48 h, respectively (independent samples t-test,  $P < 0.05$  for figure 2a). \*

67 Values are significantly different between the bacterial populations of *G. vaginalis* and

68 second BV-associated in dual-species biofilms (paired samples t-test for figure 2b,  $P <$

69 0.05).

70

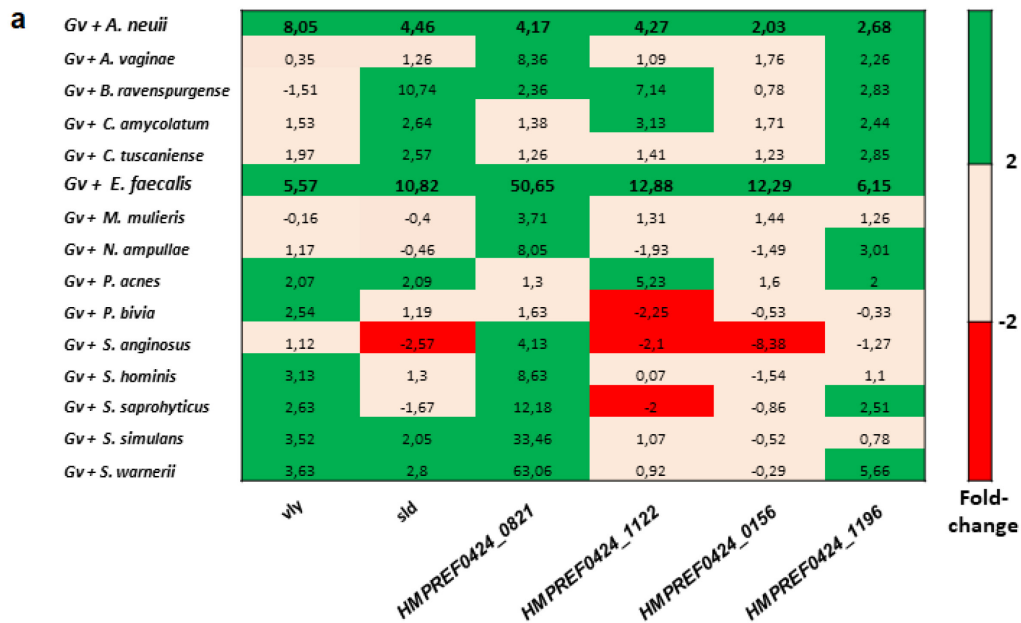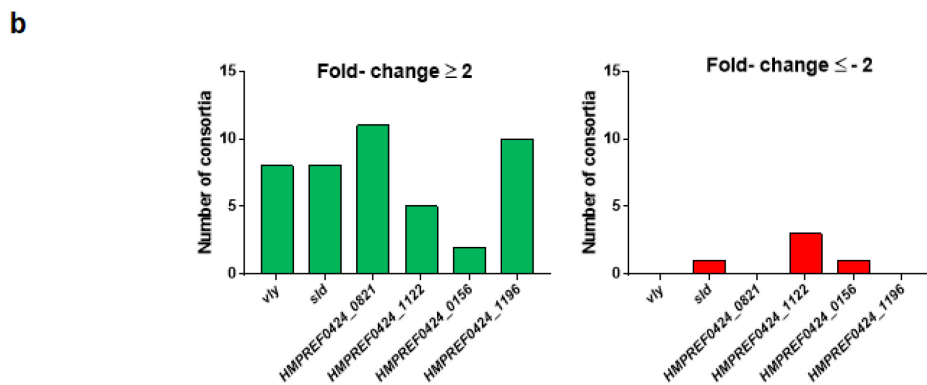

71

72 **Supplementary Figure S3.** Summarizing the transcript levels of all six potential

73 virulence genes of *G. vaginalis* among 15 bacterial consortia. (a) *G. vaginalis* up-

74 regulation in dual-species biofilms (fold-change difference  $\geq 2$ ), in which *A. neuui* and

75 *E. faecalis* caused an overexpression of all 6 transcripts in *G. vaginalis*. Specific

76 molecular interactions of some consortia were found, leading to a unique change in *G.*

77 *vaginalis* transcriptome for *vly* (BVGv/*P. bivia* or BVGv/*S. saprophyticus* dual-species

78 biofilms) and *HMPREF0424\_0821* transcripts (BVGv/*M. mulieris* or BVGv/*S.*

79 *anginosus* dual-species biofilms). A specific down-regulation of *HMPREF0424\_1122*

80 transcript was found to BVGv/*S. saprophyticus* or BVGv/*P. bivia* dual-species biofilms.

81 (b) Number of bacterial consortia that causes an up- or down-regulation in the six

82 virulence genes of *G. vaginalis*.
